# Supplementary material for: Inflammatory Caspase Activity Mediates HMGB1 Release and Differentiation in Myoblasts Affected by Peripheral Arterial Disease
Source: MDPI journal article supplement (doi:10.3390/cells11071163), 2022-03-30
Supplement: s1 [file s1]

## SUPPLEMENTAL MATERIALS

**Supplemental Figure S1** – Graphic demonstrating source of muscle tissue from human samples, and processing techniques to isolate myoblasts

**Supplemental Figure S2 – Caspase-1 expression is elevated in patients with intermittent claudication.** Patients undergoing surgery for either non-ischemic vascular disease (N= 13), intermittent claudication (N=14), or critical limb ischemia (N=17) were the sources of muscle tissue which was harvested using core-needle biopsy. Sections were stained for caspase-1, dystrophin to visualize the muscle outline, DAPI for nuclei and smooth muscle actin to identify arterioles. Expression of caspase-1 measured using mean fluorescence intensity was significantly higher in muscle harvested from patients with intermittent claudication compared to the other two groups (\*\*p<0.01).
